# Supplementary material for: The Rice B-Box Zinc Finger Gene Family: Genomic Identification, Characterization, Expression Profiling and Diurnal Analysis
Source: PubMed Central journal article supplement (PMC3485221; doi:10.1371/journal.pone.0048242), 2012-10-31

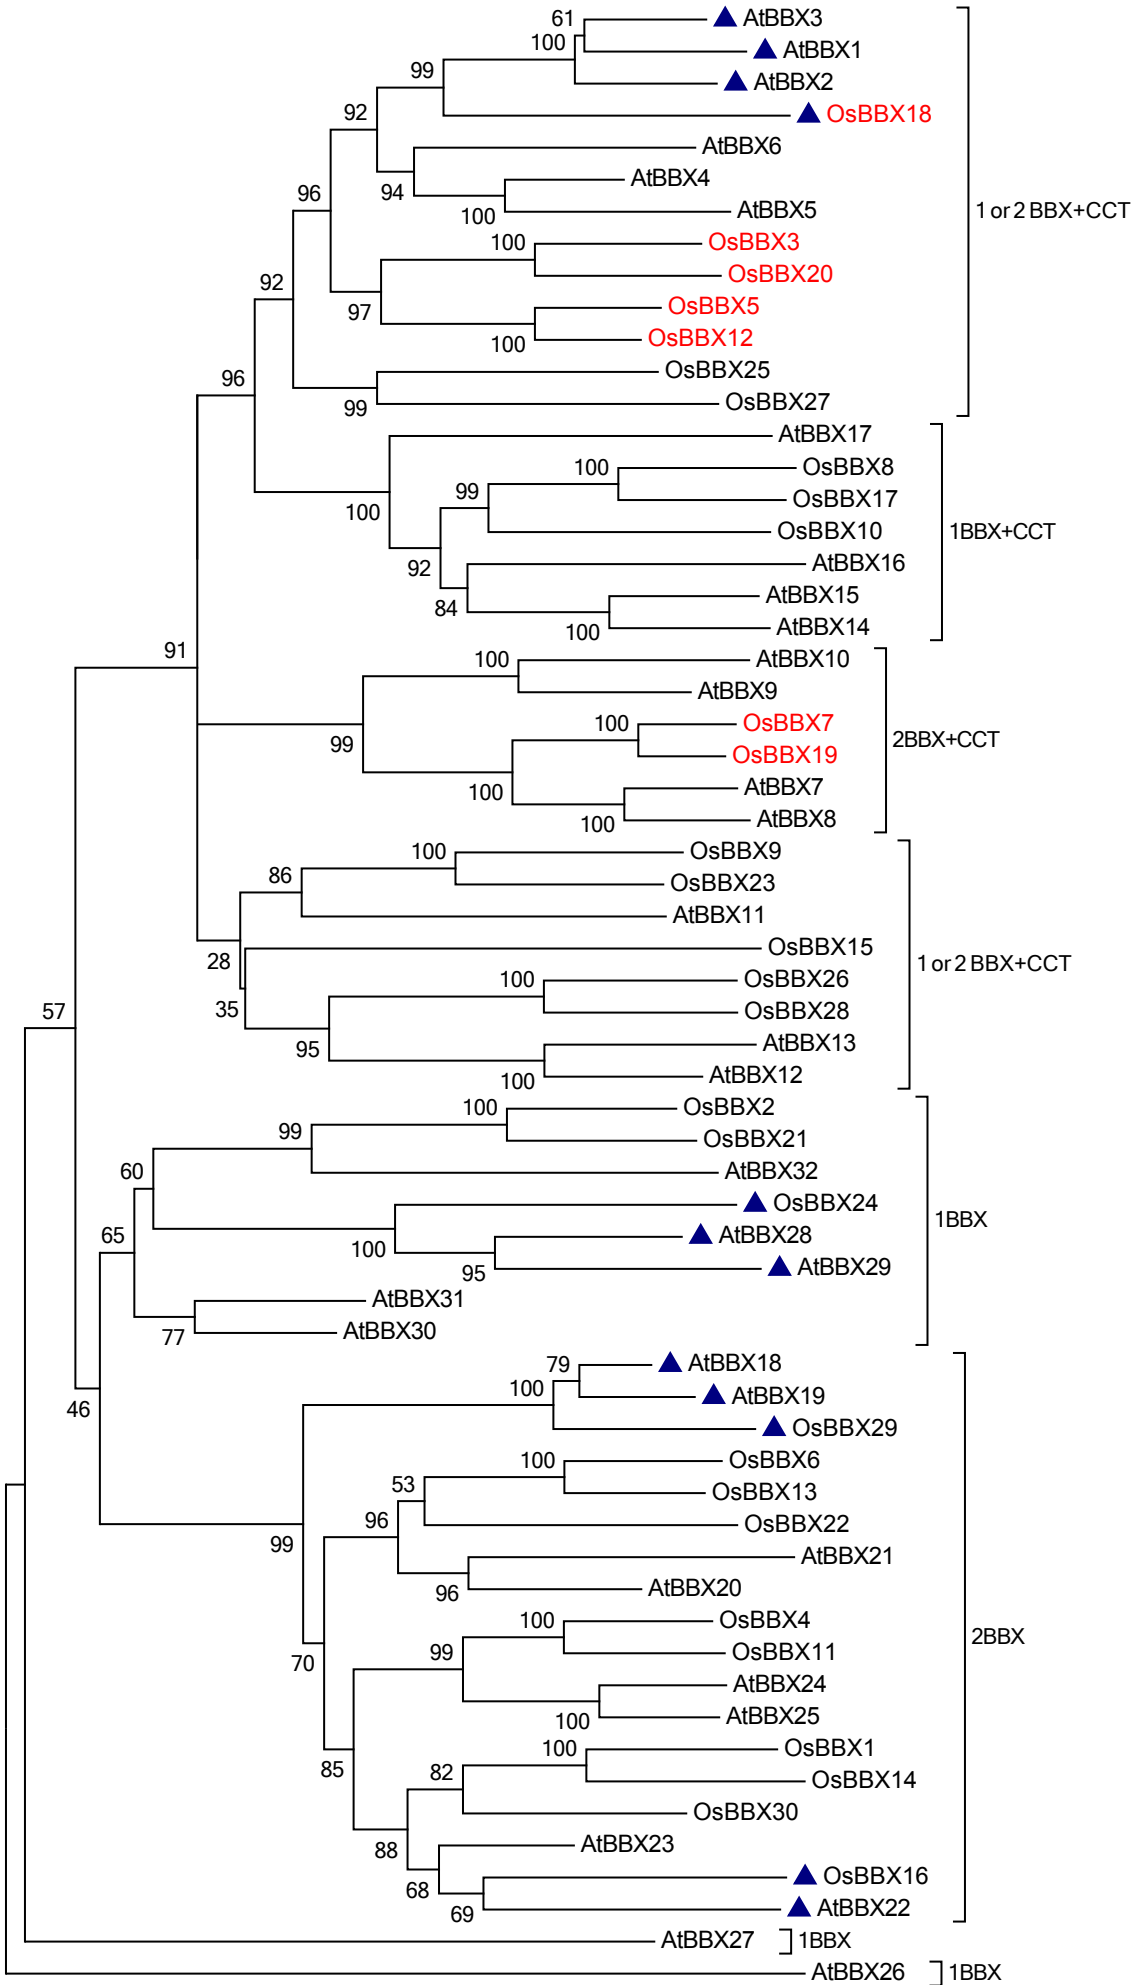

Supplement: pone.0048242.s003.pdf [file pone.0048242.s003.pdf]
